# Supplementary material for: Clostridioides difficile infection after cardiac surgery: Assessment of prevalence, risk factors and clinical outcomes—retrospective study
Source: PeerJ. 2020 Sep 29;8:e9972. doi: 10.7717/peerj.9972 (PMC7531357; doi:10.7717/peerj.9972)
Supplement: Supplemental Information 1 [file peerj-08-9972-s001.xls]

## Sheet: DATA
Clostridium difficile infection (CDI)	age (years)	age above 65 years	sex (0-male, 1-female)	time (month) of diarrhea occured (1- January, 2- February, 3-March, 4-April, 5- May, 6-June, 7-July, e.t.c……….)	time between hospital admission and diarrhea occurence (days)	times between the surgery and CDI test (days)	0-survivor, 1-nonsurvivor	recurrence of CDI (0-no, 1- yes)	treatment of CDI (1-Metronidazole, 2-Vancomycin, 3-both, 4-Fidaxomicin)	Severity of CDI ( 1-nonsevere, 2-severe, 3-fulminant)	fecal microbiota transplant (0-no, 1-yes)	time of hospitalization after diarrhea (days)	Length of ICU stay before the diarrhea (days)	Assisted ventilation before the diarrhea (days)	Type of surgery: 1-CABG, 2-VHS (valvular heart surgery), 3-CABG+VHS, 4-Aortic surgery, 5-CABG+Aortic surgery	Timing of surger: 0-elective, 1-emergent	reoperation (0-no, 1-yes)	preoperative White Blood Count (WBC) (10 3/µL)	WBC on the day diarrhea occured (10 3/µL)	preoperative Creatinine (µmol/L)	Creatinine on the day of diarrhea occured (umol/L)	Creatinine on the day diarrhea occured (mg/dL)	CRP on the day diarrhea occured (mg/L)	heigh (cm)	weigh (kg)	BMI	BMI above 25.0 kg/m2	proton pump inhibitors (PPI) use (0-no, 1-yes)	peptic ulcer disease (0-no, 1-yes)	Acetylsalicylic acid (ASA) (0-no, 1-yes)	Corticosteroids use (0-no, 1-yes)	Beta blockers use (0-no, 1-yes)	angiotensin-converting enzyme (ACE) use (0-no, 1-yes)	Statins use (0-no, 1-yes)	History of malignant neoplasms (0-no, 1-yes)	Coronary disease (0-no, 1-yes)	hipercholesterolemia (0-no, 1-yes)	Atrial fibrillation (0-no, 1-yes)	hipertension ( 0-no, 1-yes)	Diabetes mellitus (0-no, 1-yes)	Insulin (0-no,1-yes)	anti-diabetic medicines (not insulin) (0-no, 1-yes)	Chronic kidney disease (0-no, 1-yes)	Atherosclerosis (0-no, 1-yes)	chronic obstructive pulmonary disease (COPD) (0-no, 1-yes)	Thyroid disease (0-no, 1-yes)	Hospitalization < 6 month before the surgery (0-no, 1-yes)	preoperative left ventricular ejection fraction (EF) (%)	postoperative left ventricular ejection fraction (EF) (%)
positive	78	1	0	3	45	44	0	1	1	1	0	22	37	1	5	0	0	6.63	13.42	78	66	0.74	117	165	80	29.38	1	1	0	1	0	1	1	1	0	1	0	0	1	1	0	1	0	0	0	0	1	25	35
positive	75	1	0	3	24	23	0	0	1	1	0	11	2	1	3	0	0	9.76	5.63	86	73	0.82	27	168	70	24.8	0	1	1	1	0	1	1	1	0	1	1	1	1	1	1	0	1	0	0	0	1	25	35
positive	73	1	0	8	5	5	1	0	3	2	0	8	6	6	1	1	0	9.63	9.98	71	186	2.1		175	85	27.7551	1	1	0	1	0	1	1	1	0	1	0	0	0	0	0	0	0	0	0	0	0	40	50
positive	82	1	0	4	11	8	0	0	1	2	0	30	8	8	3	0	0	7.21	15.08	104	127	1.43		170	95	32.872	1	0	0	1	0	1	0	1	0	1	1	1	0	0	0	0	0	0	0	1	1	50	50
positive	78	1	0	3	10	9	0	1	3	1	0	20	2	1	2	0	0	3.76	6.11	87	65	0.73	74	162	71	27.0538	1	1	1	1	0	1	0	1	0	1	1	1	1	1	1	0	0	1	0	0	1	50	40
positive	71	1	0	3	42	41	0	0	1	1	0	3	2	1	1	1	0	9.13	7.24	135	125	1.41	63	175	85	27.7551	1	1	1	1	0	1	1	1	0	1	1	0	1	0	0	0	1	1	0	0	1	55	45
positive	78	1	0	11	6	5	0	0	3	2	0	14	2	1	2	0	0	5.26	9.11	101	180	2.03	98	165	67	24.6097	0	1	0	1	1	1	1	1	0	0	1	0	1	0	0	0	0	1	0	0	1	70	58
positive	77	1	0	4	42	41	0	0	1	1	0	14	6	2	3	0	0	6.24	8.36	133	141	1.59	19	175	90	29.3878	1	1	0	1	0	0	1	1	0	1	1	1	1	1	1	1	1	1	1	0	1	55	40
positive	80	1	0	6	40	39	0	0	1	1	0	9	2	1	1	0	0	6.31	6.19	155	176	1.99	41	166	64	23.2254	0	1	1	1	0	1	0	1	0	1	1	1	1	0	0	0	1	1	0	1	1	70	60
positive	50	0	0	3	62	59	0	0	3	1	0	37	53	40	1	1	0	8.73	13.3	99	89	1	162	182	103	31.0953	1	1	1	1	0	1	0	1	0	1	1	0	1	1	1	0	0	1	1	0	0	40	30
positive	73	1	0	11	4	4	0	0	3	2	0	22	4	4	4	1	0	7.87	7.98	72	416	4.7	53	176	81	26.1493	1	1	0	1	0	1	0	0	1	0	0	0	1	0	0	0	0	1	0	0	1	50	50
positive	77	1	1	5	12	11	0	0	3	2	0	9	5	2	1	0	0	7.84	17.89	90	82	0.92	110	144	55	26.5239	1	1	0	1	0	1	1	1	0	1	1	0	1	1	1	0	0	1	0	1	1	65	70
positive	84	1	0	9	22	13	0	0	1	1	0	4	2	1	2	0	1	12.63	10.34	102	102	1.15	71	166	78	28.306	1	1	1	1	0	1	1	1	1	1	1	0	1	0	0	0	0	1	0	0	1	65	49
positive	53	0	0	9	18	17	0	0	1	1	0	5	3	1	2	1	0	7.2	8.66	449	579	6.5	80	167	107	38.3664	1	1	1	1	0	1	0	1	0	0	1	1	1	1	0	0	1	1	0	0	1	60	49
positive	85	1	0	12	36	36	0	0	1	2	0	4	2	1	1	1	0	10.41	21.41	89	72	0.8	30	182	80	24.1517	0	1	0	1	0	0	1	0	1	1	0	0	1	1	0	1	0	1	0	0	1	55	45
positive	76	1	1	9	67	65	0	0	1	2	0	14	1	1	1	0	0	12.3	16.55	131	133	1.5	35	147	73	33.7822	1	1	0	1	0	1	0	1	0	1	1	0	1	1	1	0	1	1	0	1	1	55	40
positive	85	1	1	4	37	35	1	0	1	2	0	20	25	16	2	0	0	7.76	35.76	82	58	0.65	37	156	37	15.2038	0	1	0	1	0	0	1	1	0	0	1	0	0	0	0	0	0	1	0	1	1	60	30
positive	69	1	0	12	19	18	0	0	2	3	0	11	1	1	5	0	0	10.34	13.83	66	78	0.88	106	173	70	23.3887	0	1	0	1	0	1	0	1	0	1	1	1	1	0	0	0	0	0	0	0	1	50	40
positive	64	0	0	3	32	31	0	0	1	2	0	9	1	1	1	1	0	6.14	15.5	90	102	1.15	8	179	92	28.7132	1	1	0	1	1	1	1	1	0	0	1	0	1	0	0	0	0	0	0	0	1	55	30
positive	64	0	0	8	10	3	0	0	3	1	0	15	1	1	1	1	0	6.23	14.1	151	182	2.05	253	182	94	28.3782	1	1	0	1	0	1	1	1	0	1	1	0	1	1	1	0	0	1	0	0	1	30	45
positive	80	1	1	3	4	3	0	1	3	2	0	11	2	1	2	1	0	9.63	16.47	125	189	2.13	189	152	81	35.0589	1	0	0	1	0	1	0	1	0	1	1	0	1	1	0	1	0	1	1	1	1	65	40
positive	78	1	0	10	7	3	0	0	3	1	0	11	3	1	1	0	0	8.68	13.53	86	86	0.97	320	166	69	25.04	1	1	0	1	0	1	1	1	0	1	1	1	1	1	0	1	0	0	0	0	1	20	40
positive	55	0	0	12	12	12	0	0	3	2	0	1	5	1	2	1	1	14.11	16.23	350	474	5.3	35	165	65	23.88	0	1	1	1	0	1	0	1	0	0	1	0	1	1	1	0	1	1	0	0	1	55	30
positive	67	1	1	12	10	9	0	0	1	2	0	11	2	2	2	0	0	6.31	20.35	72	86	0.97	25	165	73	26.8136	1	1	0	1	0	0	1	1	0	0	1	0	1	0	0	0	0	0	0	0	1	60	56
positive	56	0	0	11	7	6	0	0	3	1	0	7	1	1	2	0	0	5.33	8.23	68	80	0.9	202	171	80	27.3588	1	0	0	1	0	0	0	1	0	0	1	0	0	0	0	0	0	0	0	0	1	60	50
positive	82	1	1	4	34	34	0	0	1	2	0	8	5	2	1	1	0	10.05	15.94	112	54	0.6	80	172	98	33.126	1	1	0	1	0	1	1	0	0	1	0	1	1	1	1	1	0	0	0	0	1	25	40
positive	77	1	1	9	24	23	0	0	1	1	0	14	4	1	2	0	0	7.85	14.77	86	114	1.28	10	160	76	29.6875	1	1	0	1	0	1	1	1	0	1	1	1	1	0	0	0	0	0	1	0	1	60	50
positive	72	1	1	4	35	34	0	1	1	2	0	18	8	2	2	0	0	7.66	15.09	92	102	1.15	169	158	98	39.2565	1	1	0	1	0	1	0	1	0	1	1	0	1	1	0	1	0	0	0	0	1	65	80
positive	63	0	1	1	7	6	0	1	3	2	0	17	4	1	3	0	0	7.92	17.4	438	191	2.16	64	166	75	27.2173	1	1	0	1	0	1	0	1	0	1	1	0	1	1	0	1	1	1	0	0	1	50	30
positive	60	0	0	4	60	57	1	0	1	1	0	43	43	34	2	1	1	5.64	23	102	90	1.01	95	171	52	17.7832	0	1	0	0	0	1	0	0	0	0	0	1	0	0	0	0	0	0	0	0	1	25	20
positive	66	1	1	2	6	4	0	1	3	2	1	15	3	1	1	0	0	8.49	8.26	93	204	2.3	444	152	75	32.4619	1	1	0	1	0	1	1	1	0	1	1	0	1	0	0	0	0	0	0	0	1	65	55
positive	69	1	1	3	6	5	0	0	3	3	0	14	17	7	4	1	0	7.88	10.03	78	54	0.61	36	156	71	29.1749	1	1	0	1	0	1	1	1	0	1	1	1	1	1	1	0	0	1	0	0	1	60	80
positive	64	0	0	7	14	7	0	0	3	1	0	18	7	7	3	1	0	9.56	12.41	140	113	1.27	55.9	164	60	22.3081	0	1	1	1	0	1	1	1	1	1	1	0	0	0	0	0	1	1	0	0	1	50	40
positive	60	0	1	7	9	8	0	0	1	1	0	14	8	1	2	0	1	3.92	8.9	90	100	1.13	80	163	68	25.5937	1	1	0	0	0	0	1	0	0	0	0	1	1	0	0	0	1	0	0	0	1	65	60
positive	64	0	1	2	14	13	0	0	1	2	0	1	1	1	2	0	0	5.53	16.14	100	100	1.13	35	150	61	27.11	1	1	0	1	0	1	0	1	0	0	1	1	1	1	1	0	1	0	0	1	1	60	45
positive	70	1	0	5	6	4	0	0	1	2	0	12	4	1	1	0	0	6.56	8.97	160	289	3.2		166	78	28.306	1	1	1	1	0	1	1	1	0	1	1	1	1	0	0	0	1	1	0	0	1	60	50
positive	63	0	1	6	62	61	1	0	3	2	0	26	1	1	1	0	0	8.49	33	63	105	1.18		153	83	35.16	1	1	0	1	0	1	1	1	0	1	1	0	1	1	1	0	0	1	0	0	1	70	55
positive	84	1	0	2	14	7	1	0	3	3	0	14	2	1	2	1	0	9.08	18.58	89	127	1.43		160	90	35.16	1	1	0	1	0	1	0	1	0	1	1	0	1	1	0	1	0	1	0	0	0	50	40
positive	55	0	0	4	10	9	0	0	1	2	0	32	11	6	4	1	0	14.31	15.72	152	140	1.5	85	170	61	21.11	0	0	0	0	0	0	0	0	0	0	0	0	1	0	0	0	0	0	0	0	0	30	40
positive	78	1	1	2	5	4	1	0	3	2	0	5	2	2	1	1	0	7.41	16.65	83	184	2.08	320	173	72	24.06	0	0	0	1	0	1	0	1	0	1	1	1	0	1	1	0	1	0	0	0	0	30	35
positive	73	1	1	4	6	5	0	0	1	1	0	3	2	1	1	1	0	7.14	9.99	80	88	0.99	85	165	75	27.55	1	0	0	1	0	1	1	1	0	1	1	0	1	0	0	0	0	0	0	1	1	55	40
positive	68	1	1	3	32	31	0	0	1	2	0	4	2	1	1	0	0	7.38	18.27	82	471	5.32	113	148	83	37.89	1	1	0	1	0	1	1	1	0	1	1	0	1	1	0	1	1	1	1	1	1	60	60
positive	75	1	0	1	4	3	0	0	3	1	0	7	1	1	1	0	0	7.02	11.33	97	78	0.88	13	173	57	19.05	0	1	1	1	0	1	1	1	0	1	1	0	1	0	0	0	0	0	0	0	1	20	45
positive	82	1	1	8	7	6	1	0	3	2	0	24	1	1	2	0	0	4.85	8.4	117	275	3.1	21	161	50	19.2894	0	1	1	1	0	1	0	0	0	0	0	0	1	0	0	0	1	0	0	0	1	60	60
positive	76	1	1	9	7	5	1	1	3	1	0	43	6	1	2	0	0	6.64	7.29	154	204	2.3	65	156	98	40.2696	1	1	0	0	0	1	1	1	0	1	1	1	1	0	0	0	0	0	0	1	1	65	60
positive	68	1	0	6	17	16	0	0	3	3	0	25	16	10	1	1	0	11	14.27	77	62	0.7	33	170	61	21.11	0	1	1	1	0	1	1	1	1	1	1	1	1	0	0	0	0	1	0	0	1	45	25
positive	79	1	0	6	22	21	0	0	3	1	0	52	3	2	2	1	0	4.55	5.26	111	94	1.06	25	169	74	25.91	1	1	0	1	0	1	0	1	0	0	1	1	1	1	1	0	0	0	1	0	1	40	25
positive	62	0	0	3	6	5	0	0	3	2	0	25	2	1	2	1	0	8.01	19.52	157	288	3.25	263	165	60	22.04	0	1	0	1	0	1	1	1	1	1	1	0	1	0	0	0	1	1	0	0	1	20	50
positive	88	1	0	9	46	44	0	0	1	2	0	1	5	1	2	0	0	4.44	19.25	91	106	1.19	196	160	74	28.9	1	1	0	1	0	1	1	1	1	1	1	1	1	0	0	0	0	0	0	1	1	60	60
positive	77	1	0	8	19	17	0	0	3	1	0	3	6	1	2	0	0	7.96	7.16	84	107	1.2	16	164	117	43.5	1	1	0	1	0	1	1	1	0	1	1	1	1	1	1	0	1	0	0	1	1	60	40
positive	71	1	0	9	17	9	0	0	1	1	0	37	7	1	4	0	0	6.14	11.61	123	120	1.35		180	72	22.22	0	1	0	1	0	1	1	1	0	1	1	1	1	0	0	0	0	0	0	0	1	60	50
positive	77	1	0	11	11	10	0	0	3	1	0	6	8	1	1	0	0	7.48	9.88	82	62	0.7	31	171	83	28.3848	1	1	0	1	0	0	0	1	0	1	1	0	1	0	0	0	0	1	0	0	1	50	50
positive	54	0	0	11	5	4	0	0	1	1	0	4	1	1	4	0	0	6.38	8.86	85	91	1.02	180	179	98	30.5858	1	0	0	0	0	1	0	1	0	0	1	0	1	0	0	0	0	0	0	0	1	65	47
positive	77	1	0	11	9	8	0	0	3	2	0	28	3	1	3	1	0	7.2	22.47	73	123	1.39	12	176	100	32.28	1	1	0	1	0	1	1	1	0	1	1	1	1	1	0	1	0	1	0	0	1	50	50
positive	73	1	1	10	6	5	0	0	3	1	0	9	4	1	2	0	0	6.83	14.64	64	66	0.74		150	74	32.88	1	1	0	0	0	1	1	1	0	0	1	1	1	0	0	0	0	1	0	1	1	55	50
positive	55	0	0	2	4	3	0	1	3	1	1	41	2	1	1	0	0	8.82	6.4	77	82	0.92	470	178	120	37.87	1	1	0	1	0	1	1	1	0	1	1	0	1	1	1	0	0	0	0	0	1	47	48
positive	76	1	1	4	7	6	1	0	3	2	0	21	6	1	5	1	0	8.38	40.46	92	149	1.68		164	58	21.5645	0	1	0	0	0	1	1	0	0	0	0	0	0	0	0	0	0	0	0	0	1	60	70
positive	79	1	0	4	26	25	0	0	1	2	0	10	4	1	2	0	0	5.55	10.58	87	245	2.7	232	160	85	33.2031	1	1	0	1	0	1	1	1	0	1	1	0	1	0	0	0	0	1	0	0	1	60	45
positive	68	1	0	3	26	20	0	0	1	2	0	7	5	1	2	0	0	9.73	17.03	87	92	1.04	49.9	174	84	27.7447	1	1	0	1	0	1	0	1	0	1	1	0	1	0	0	0	0	1	0	0	1	30	15
positive	84	1	0	2	4	4	1	0	2	1	0	2	3	1	1	1	0	9.84	8.73	95	104	1.17	29	170	61	21.11	0	0	0	1	0	1	1	0	1	1	0	0	1	1	1	0	0	0	0	0	0	30	30
positive	79	1	1	5	8	7	0	0	1	1	0	1	1	1	2	0	0	6.84	6.35	150	80	0.9	35	156	71	29.1749	1	1	0	1	0	1	1	1	1	1	1	0	1	0	0	0	1	1	0	0	1	55	45
positive	68	1	1	7	35	30	0	0	3	2	0	15	30	15	2	0	0	2.87	15.5	86	120	1.35	5	157	69	27.993	1	1	0	1	0	1	1	1	0	1	1	1	1	0	0	0	0	1	0	1	1	55	40
positive	63	0	0	2	40	40	1	0	3	2	0	1	21	16	4	1	0	6.81	55	215	300	3.39	247	182	93	28.08	1	1	0	0	0	1	0	0	0	0	0	0	1	0	0	0	0	0	0	0	0	35	65
positive	83	1	0	3	6	4	0	0	2	2	0	10	4	1	1	1	0	7.62	5.85	107	204	2.3	120	175	94	30.69	1	1	0	1	0	1	0	1	0	1	1	0	1	0	0	0	1	0	0	0	1	60	40
positive	77	1	0	3	13	12	1	0	3	1	0	28	12	6	3	0	0	5.7	6.93	94	127	1.43	220	165	79	29.02	1	0	0	1	1	0	1	1	0	1	1	1	1	0	0	0	1	1	0	0	1	55	45
positive	50	0	0	4	32	28	1	0	3	2	0	10	28	28	2	1	1	6.59	39.87	87	93	1.05	360	167	61	21.87	0	1	0	0	0	0	0	0	0	0	0	0	0	0	0	0	0	0	0	0	1	50	40
positive	78	1	0	3	7	6	1	0	2	3	0	2	8	3	1	1	0	4.42	42.8	67	58	0.65	12	172	72	24.34	0	1	0	1	0	1	0	1	0	1	1	1	0	0	0	0	0	0	0	0	1	40	40
positive	75	1	1	8	5	4	0	0	1	1	0	9	2	1	2	0	0	5.64	5.32	103	92	1.04	29	164	84	31.23	1	1	1	1	1	1	0	1	0	0	1	1	1	0	0	0	0	0	0	1	1	60	70
positive	62	0	1	10	20	19	1	0	3	2	0	3	19	13	2	1	0	7.7	18	94	90	1.01	80	152	115	49.77	1	1	1	0	0	1	1	1	0	0	1	1	1	0	0	0	0	0	1	1	0	30	20
positive	55	0	0	2	4	3	0	1	3	1	0	13	2	1	1	0	0	8.82	6.4	77	82	0.92	470	178	120	37.87	1	1	0	1	0	1	1	1	0	1	1	0	1	1	1	0	0	0	0	0	1	45	48
negative	78	1	0		33	32	0								3	0	0	11.05	10.24	115				165	62	22.77	0	1	0	1	0	0	1	1	0	1	1	1	1	0	0	0	1	1	0	0	1	45	50
negative	77	1	1		8	7	0								2	0	0	5.82	24.85	77				156	85	34.93	1	0	1	1	0	1	1	1	0	0	1	0	1	0	0	0	0	1	0	0	1	67	60
negative	82	1	0		48	47	0								2	0	0	5.26	10.87	84				165	84	30.85	1	1	0	1	0	1	0	1	0	0	1	0	1	0	0	0	0	0	0	0	1	55	45
negative	50	0	1		9	6	0								2	0	1	11	6.48	96				171	56	19.15	0	1	0	0	0	0	1	0	0	0	0	1	1	0	0	0	0	0	0	0	1	60	60
negative	71	1	1		7	6	0								2	0	0	6.57	6.35	89				160	86	33.59	1	1	0	0	0	0	1	1	0	0	1	1	0	0	0	0	0	0	0	0	1	55	40
negative	55	0	0		10	4	0								3	0	0	6.98	11.32	100				155	72	29.97	1	0	0	1	0	1	1	1	0	1	1	0	1	0	0	0	0	1	0	0	0	50	40
negative	58	0	0		29	23	0								1	1	0	30.75	27.31	73				170	70	24.22	0	1	0	1	0	1	0	0	0	0	0	1	1	0	0	0	0	1	0	0	1	40	10
negative	70	1	0		4	3	0								2	0	0	7.87	11.65	106				178	115	36.3	0	0	0	1	0	1	0	1	0	0	1	0	1	0	0	0	0	1	0	0	1	55	55
negative	85	1	0		5	5	0								4	1	0	10.51	10.5	140				170	70	24.22	0	1	0	0	0	1	0	0	0	0	0	0	1	0	0	0	0	0	0	0	0	45	65
negative	60	0	0		25	19	0								1	0	0	9.54	4.45	61				181	91	27.78	1	1	0	0	0	1	0	1	0	1	1	0	1	0	0	0	0	1	1	0	0	40	35
negative	72	1	0		37	36	0								1	0	0	12.04	10.5	96				173	84	28.07	1	1	0	1	0	1	0	1	0	1	1	1	1	1	1	0	1	1	0	0	1	50	35
negative	54	0	0		14	7	0								4	1	0	16.42	15.8	102				183	82	24.49	0	1	0	1	0	1	1	1	0	1	1	0	1	0	0	0	0	0	0	0	0	60	40
negative	62	0	0		39	38	0								2	0	0	8.71	8.71	73				182	114	34.42	1	1	0	1	0	1	1	1	0	0	1	0	1	1	0	1	0	1	0	0	1	60	50
negative	64	0	0		8	7	0								1	1	0	13.29	7.01	68				164	60	22.31	0	1	0	1	0	0	0	1	0	1	1	1	1	0	0	0	0	0	0	0	1	30	25
negative	80	1	1		5	4	0								2	0	0	8.68	7.77	68				140	49	25	0	0	0	1	0	1	0	1	0	0	1	0	1	0	0	0	0	0	0	1	1	38	45
negative	60	0	0		11	10	0								2	0	0	7.79	9.39	107				172	95	32.11	1	1	0	1	0	1	0	1	0	0	1	1	1	1	1	0	1	0	0	0	1	65	70
negative	57	0	0		37	37	0								1	1	0	16.91	9.22	74								1	0	0	0	0	0	0	0	1	0	0	0	0	0	0	0	0	0	0	0	50	60
negative	58	0	0		19	18	0								2	0	0	6.27	10.35	84				170	59	20.42	0	1	0	1	0	1	1	0	0	1	1	0	1	0	0	0	0	0	0	0	1	50	60
negative	61	0	0		20	13	0								2	1	1	8.15	6.12	102				174	95	31.38	1	1	0	0	0	1	0	0	0	0	0	1	1	1	0	1	0	0	0	0	0	55	50
negative	52	0	0		21	13	0								2	1	0	7.69	8.97	106				178	88	27.77	1	1	1	1	1	1	0	0	0	0	0	0	1	0	0	0	0	0	0	0	0	30	20
negative	18	0	1		15	14	0								2	0	1	12.6	7.56	65				162	63	24.01	0	1	0	0	0	0	0	0	0	0	0	0	0	0	0	0	0	0	0	0	0	70	60
negative	74	1	0		18	17	0								2	0	0	6.36	13.1	122				160	70	27.34	1	0	0	1	0	1	1	1	0	0	1	0	1	0	0	0	0	0	0	0	0	40	30
negative	83	1	0		7	6	0								3	1	0	5.56	7.2	88				170	71	24.57	0	1	1	1	0	1	1	1	0	1	1	0	1	0	0	0	0	0	0	0	1	55	60
negative	65	0	0		10	10	0								1	1	0	8.01	7.84	88				178	115	36.3	1	1	0	1	0	1	1	1	0	1	1	0	1	0	0	0	0	0	0	0	0	50	58
negative	71	1	0		7	6	1								1	0	0	13.45	15.93	83				166	72	26.13	1	0	0	1	0	0	0	1	0	1	1	0	1	1	1	0	0	1	0	0	1	45	35
negative	44	0	0		12	12	0								4	1	0	27.34	21.74	125				182	87	26.26	1	1	0	0	0	0	0	0	0	0	0	1	1	0	0	0	0	0	0	0	0	55	45
negative	67	1	0		22	19	0								1	0	0	8.28	14.37	64				167	89	31.91	1	0	0	1	0	0	1	1	0	1	1	0	1	1	0	1	0	0	0	0	1	25	20
negative	86	1	1		8	5	0								2	0	0	6.54	15.49	103				147	60	27.77	1	1	0	0	0	0	0	1	0	1	1	1	0	0	0	0	1	1	0	0	1	60	60
negative	54	0	0		1	0	1								2	0	0	6.19	14.59	74				168	95	33.66	1	1	0	0	0	1	0	1	0	0	1	0	1	0	0	0	0	0	0	0	1	55	55
negative	74	1	0		10	8	0								2	0	0	12	10.21	107				180	94	29.01	1	1	0	0	0	1	1	1	0	0	1	1	1	1	1	0	1	1	1	0	1	55	45
negative	67	1	0		11	10	1								2	0	0	8	12.65	75				170	90	31.14	1	1	0	0	0	1	0	1	0	0	1	1	1	1	0	1	1	1	1	0	1	40	25
negative	76	1	1		19	18	0								1	0	0	11.22	45.57	70				154	56	23.61	0	1	0	1	0	1	0	1	0	1	0	0	1	0	0	0	0	0	1	0	1	40	60
negative	67	1	0		25	10	1								4	0	0	6.5	25.79	115				170	86.5	29.76	1	1	0	1	0	0	0	0	0	0	0	0	1	1	0	0	1	0	0	1	0	50	50
negative	76	1	1		14	13	0								2	0	0	7.4	15	108				156	60	24.65	0	1	0	1	0	0	0	1	0	0	1	1	1	0	0	0	0	0	0	0	1	70	80
negative	77	1	1		23	22	0								4	0	0	8	13.49	104				153	83	35.46	1	1	0	1	0	1	0	1	0	1	1	0	1	0	0	0	0	0	0	0	1	60	60
negative	72	1	0		9	7	0								1	1	0	7.81	8.74	106				172	113	38.2	1	1	0	1	0	0	1	1	0	1	1	0	1	1	1	0	0	1	1	0	1	40	38
negative	55	0	0		7	6	0								2	0	0	10.98	7.03	109				160	75	29.3	1	1	0	0	0	1	0	0	0	0	1	1	0	1	1	0	0	0	0	0	1	25	15
negative	62	0	0		6	6	0								4	1	0	12.53	7.85	72				158	80	32.05	1	1	0	0	0	1	1	0	0	0	0	0	1	0	0	0	0	0	0	0	0	50	45
negative	85	1	0		9	8	0								2	1	0	18.96	12.53	211				175	65	21.22	0	0	0	1	0	0	0	0	0	1	0	1	0	0	0	0	1	1	0	0	0	35	25
negative	62	0	0		12	11	0								4	0	0	5.83	9.21	100				172	96	32.45	1	0	0	1	0	0	0	1	0	1	1	0	1	0	0	0	0	0	0	0	0	20	35
negative	54	0	0		15	5	0								4	0	1	8.73	11.26	88				176	90	30.76	1	1	0	1	0	1	0	1	0	1	1	0	1	0	0	0	1	1	0	0	0	45	45
negative	67	1	1		31	30	0								2	0	0	7.95	10.8	73				153	72	30.76	1	0	0	0	0	0	1	1	0	0	1	0	1	1	0	0	0	0	1	1	0	70	45
negative	64	0	0		6	4	0								2	0	0	8.79	7.45	99				167	63	22.59	0	1	0	1	0	0	0	0	0	0	1	0	0	0	0	0	0	0	0	0	1	65	65
negative	66	1	1		20	19	0								2	0	0	6.65	10.55	63				156	54	22.19	0	0	0	1	0	1	0	1	0	0	1	0	0	0	0	0	0	0	1	1	1	70	55
negative	74	1	1		6	5	0								2	0	0	7.19	11.79	72				154	58	24.46	0	1	0	0	1	1	0	1	0	0	1	0	1	1	0	1	0	0	0	0	1	60	70
negative	68	1	1		14	13	1								3	1	0	8	16.97	126				160	62	24.22	0	0	0	1	0	1	0	0	0	0	0	0	1	1	1	0	0	0	0	1	1	35	25
negative	52	0	0		8	5	0								2	0	0	14	21	121				168	94	33.3	1	0	0	1	0	1	1	0	0	0	0	1	1	0	0	0	0	0	0	0	1	40	40
negative	56	0	0		9	2	0								2	0	1	6.14	18.67	86				169	60	21.01	0	0	1	0	0	0	0	0	0	0	0	1	0	0	0	0	0	0	0	0	0	50	55
negative	74	1	1		9	8	0								2	0	0	9.59	10.38	69				157	83	33.67	1	0	0	1	1	1	1	1	0	1	1	0	1	1	0	1	0	1	0	1	1	60	55
negative	52	0	0		7	7	0								1	1	0	10.84	14	125				182	108	32.6	1	0	0	1	0	1	0	1	0	1	1	0	1	1	1	0	1	1	0	0	1	30	55
negative	56	0	0		10	6	0								2	0	1	6.33	6.48	125				169	60	21.01	0	0	1	0	0	0	0	0	0	0	0	1	0	0	0	0	0	0	0	0	0	55	50
negative	67	1	1		11	10	0								2	0	0	7.5	7.5	86				157	112	45.44	1	1	0	0	0	1	1	0	0	1	0	0	1	0	0	0	0	0	0	1	1	50	45
negative	65	0	1		8	7	0								2	0	0	4.13	12.79	77				146	59	27.68	1	1	0	0	0	1	0	1	0	0	1	0	1	0	0	0	0	1	0	1	1	60	30
negative	70	1	1		21	20	0								1	1	0	4.58	7.31	162				165	60	22.04	0	1	0	1	0	1	1	1	0	1	1	0	1	0	0	0	0	1	0	0	0	65	40
negative	71	1	0		8	7	0								2	0	0	8.39	8.23	108				160	63	24.61	0	1	0	0	0	0	1	1	0	1	1	0	1	0	0	0	0	0	0	0	0	65	50
negative	53	0	0		10	9	0								1	0	0	10.06	12	125				161	65	25.08	1	0	0	1	0	0	1	1	0	1	1	0	1	1	1	0	0	1	0	0	1	45	50
negative	62	0	0		16	15	0								1	0	0	5.29	13	91				173	78	26.06	1	0	0	1	0	1	0	1	0	1	1	0	1	0	0	0	0	0	0	0	1	50	50
negative	72	1	0		25	24	0								2	0	0	6.83	6.96	119				157	72	29.21	1	1	1	1	0	1	0	1	1	1	1	0	1	0	0	0	0	0	0	1	1	65	35
negative	54	0	0		8	7	0								1	1	0	10.49	7.5	73				178	65	20.52	0	1	0	0	0	0	0	0	0	0	0	0	0	0	0	0	0	0	0	0	0	30	25
negative	65	0	1		4	2	1								1	1	0	8.23	12	106				152	58	25.1	1	1	0	0	0	0	1	0	0	1	0	0	1	1	0	1	0	0	0	0	0	20	30
negative	72	1	0		23	23	0								4	1	0	26.8	11.6	329				160	66	25.78	1	1	1	0	0	1	1	0	0	0	1	0	1	0	0	0	1	0	0	0	1	20	45
negative	86	1	0		12	11	0								1	0	0	8.19	13.8	87				172	80	27	1	0	0	1	0	0	1	1	0	1	1	0	1	0	0	0	0	0	0	0	1	44	40
negative	62	0	0		24	24	0								2	1	0	30.9	16.44	384				180	80	24.69	1	0	0	0	0	0	1	0	0	0	0	0	1	0	0	0	0	0	1	0	1	25	15
negative	77	1	1		27	26	1								2	0	1	5.22	13.31	124				166	63	22.86	0	1	0	0	0	1	1	1	0	0	1	1	1	0	0	0	1	0	0	1	0	45	50
negative	67	1	0		5	4	0								3	0	0	7.57	13.14	65				164	84	31.23	1	1	0	1	0	1	1	1	0	1	1	0	1	0	0	0	0	0	0	1	1	45	30
negative	73	1	1		16	15	0								1	0	0	13.9	12.33	93				156	69	28.35	1	0	0	1	0	1	0	1	0	1	1	1	1	1	1	0	0	0	0	0	1	35	45
negative	78	1	0		12	9	0								3	0	0	7.92	8.61	199				164	94	34.95	1	0	0	1	0	1	1	1	0	1	1	1	1	0	0	0	0	0	0	0	1	40	60
negative	77	1	1		10	9	0								4	0	0	5.94	13.12	100				159	64	25.32	1	1	0	1	0	0	0	1	0	0	1	0	1	0	0	0	1	0	0	0	0	60	55
negative	48	0	0		14	13	0								4	0	0	8.6	12.85	99				167	74	26.53	1	1	0	1	0	1	1	0	0	0	0	0	1	0	0	0	0	0	0	0	1	55	35
negative	78	1	0		6	5	0								1	0	0	4.26	3.2	94				176	79	25.5	1	1	0	0	1	1	1	1	1	1	1	1	1	0	0	0	0	1	0	0	1	40	40
negative	74	1	1		8	4	0								1	0	0	9.76	24.9	155				165	64	23.51	0	1	0	0	0	1	1	1	0	1	0	0	1	0	0	0	1	0	0	1	1	45	55
negative	35	0	0		5	5	0								4	1	0	12.16	14.5	84				170	90	31.14	1	1	0	0	0	0	0	0	0	0	0	0	1	0	0	0	0	0	0	0	0	40	75
negative	81	1	0		4	4	0								1	1	0	8.81	11.16	136				186	87	25.15	1	0	0	1	0	1	0	0	0	1	1	0	1	0	0	0	0	0	0	0	0	40	40
[truncated: 45 more columns]
